# Supplementary material for: Design of a Gene Panel to Expose the Versatile Role of Hepatic Stellate Cells in Human Liver Fibrosis
Source: MDPI journal article supplement (doi:10.3390/pharmaceutics12030278), 2020-03-20
Supplement: s1 [file s1]

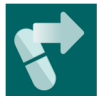

# Supplementary Materials: Design of a Gene Panel to Expose the Versatile Role of Hepatic Stellate Cells in Human Liver Fibrosis

Fransien van Dijk, Christa M. Hazelhoff, Eduard Post, Gerian G.H. Prins, Krista Rombouts, Klaas Poelstra, Peter Olinga and Leonie Beljaars

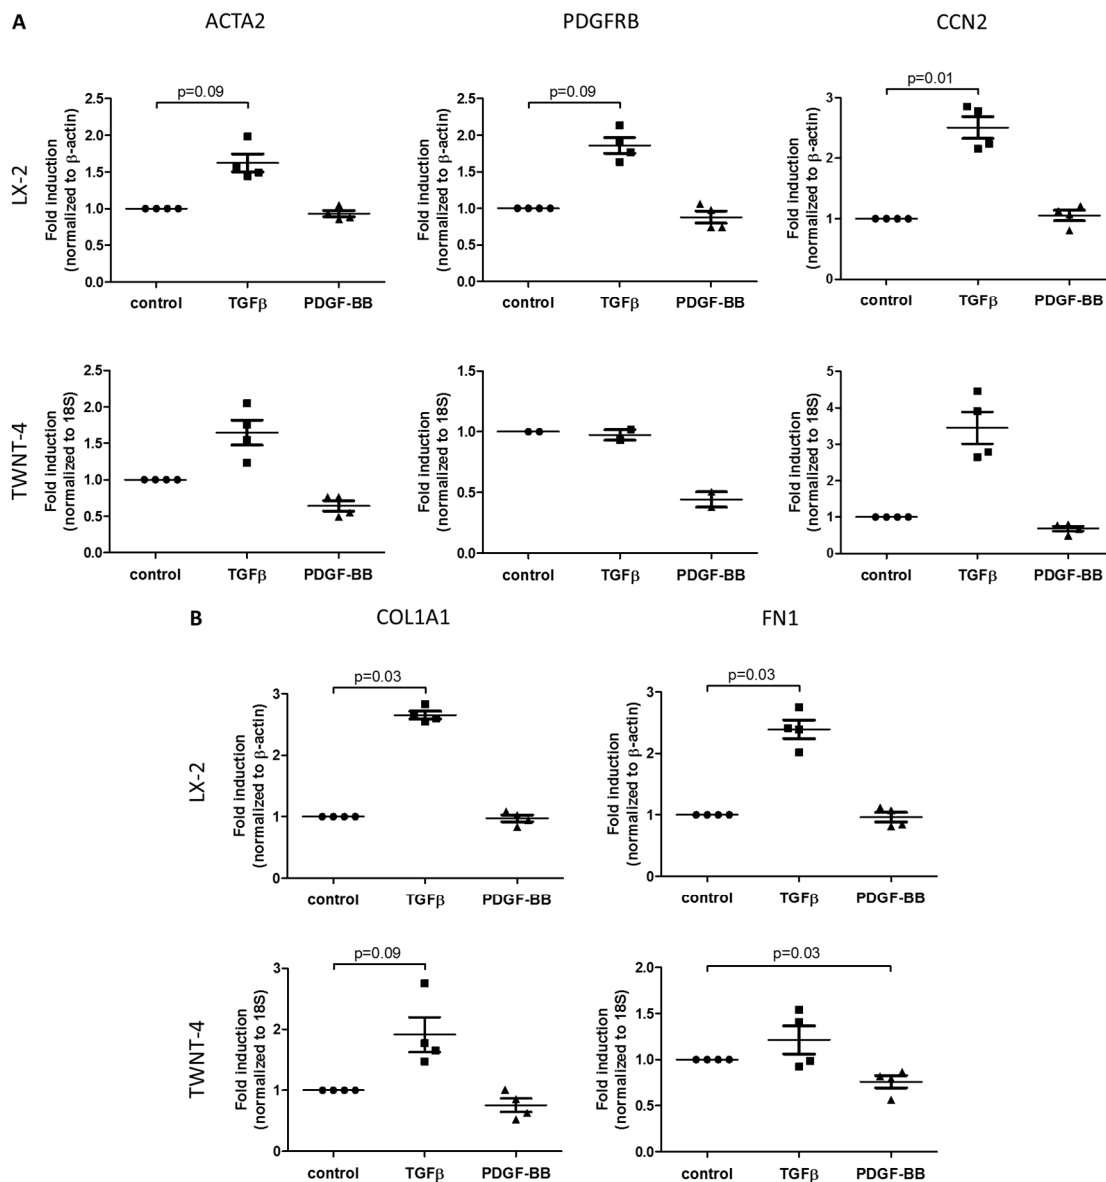

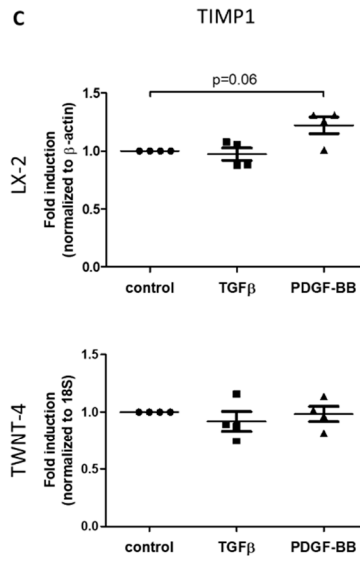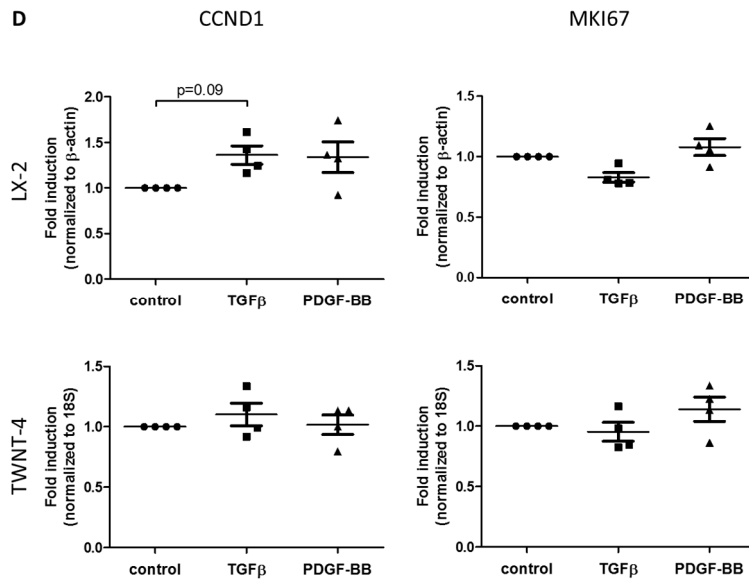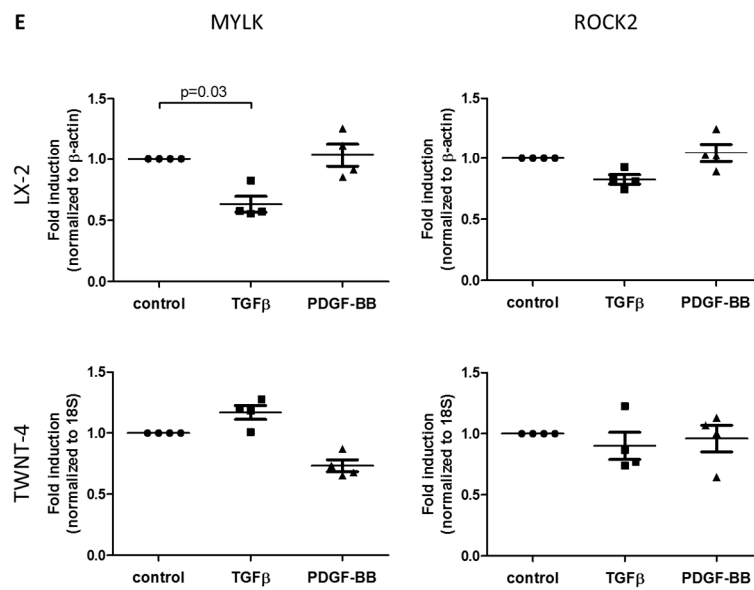



|                |            |            |            |            |            |
|----------------|------------|------------|------------|------------|------------|
| <i>MKI67</i>   | 24.2 ± 0.1 | 24.2 ± 0.7 | 22.5 ± 0.4 | 24.5 ± 0.3 | 28.8 ± 1.1 |
| <i>MYLK</i>    | 24.2 ± 0.1 | 25.4 ± 0.2 | 24.4 ± 0.3 | 28.4 ± 0.4 | 27.2 ± 1.2 |
| <i>ROCK2</i>   | 23.7 ± 0.1 | 24.9 ± 0.2 | 24.2 ± 0.4 | 26.5 ± 0.3 | 25.5 ± 0.5 |
| <i>CCL2</i>    | 23.1 ± 0.1 | 23.2 ± 0.4 | 30.1 ± 0.3 | 26.3 ± 0.4 | 23.7 ± 0.3 |
| <i>CCL5</i>    | ND         | 31.1 ± 1.1 | 30.6 ± 0.4 | ND         | 27.3 ± 0.4 |
| <i>TNF</i>     | ND         | ND         | ND         | ND         | 29.7 ± 0.7 |
| <i>CXCL8</i>   | 28.4 ± 0.2 | 26.4 ± 1.0 | 29.1 ± 0.6 | 26.3 ± 0.4 | 24.9 ± 0.7 |
| <i>PPARG</i>   | ND         | 31.1 ± 0.8 | ND         | ND         | 28.9 ± 0.3 |
| <i>CYGB</i>    | 27.3 ± 0.2 | 24.7 ± 0.7 | ND         | ND         | 29.4 ± 1.1 |
| <i>ACTB</i>    | 17.1 ± 0.1 | 16.9 ± 0.1 | 16.8 ± 0.6 | 20.5 ± 0.5 | 19.4 ± 0.2 |
| <i>RNA18S5</i> | 10.0 ± 0.2 | 7.8 ± 0.2  | 9.4 ± 0.6  | 13.7 ± 0.6 | 8.5 ± 0.7  |
